# Supplementary material for: Synthesis of amine functionalized graphite nanosheets and their water-soluble derivative for drug loading and controlled release
Source: Royal Society of Chemistry journal article supplement (doi:10.1039/c4nj01545b), 2014-12-09
Supplement: c4nj01545b1.pdf [file c4nj01545b1.pdf]

5

## Synthesis of amine functionalized graphite nanosheets and its water-soluble derivative for drug loading and controlled release

Amrita Chakravarty, Koushik Bhowmik, Goutam De<sup>\*</sup> and Arnab Mukherjee<sup>\*</sup>

10 Nano-Structured Materials Division, CSIR–Central Glass and Ceramic Research Institute,  
196, Raja S. C. Mullick Road, Kolkata 700032 (India)

Corresponding authors Fax: +91-33-24730957

E-mail addresses: arnabm@cgcri.res.in (Arnab Mukherjee) gde@cgcri.res.in (Goutam De)

### 15 Electronic Supplementary information (ESI)

20

25

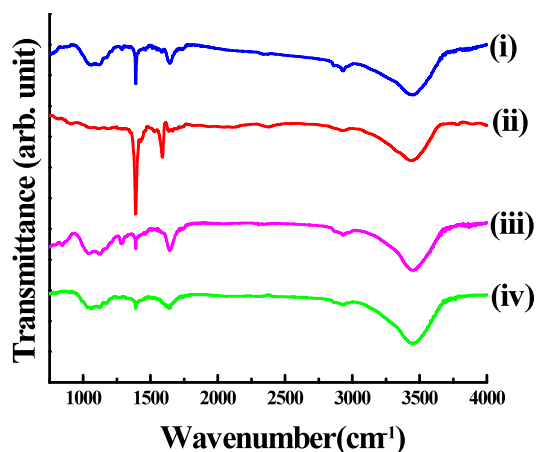

30

**Fig. S1** FTIR spectra after treatment of microcrystalline graphite with (i) 2:1, (ii) 1:1, (iii) 1:2 and (iv) 1:3 v/v ratio of HNO<sub>3</sub> and H<sub>2</sub>SO<sub>4</sub> at room temperature for 24 hrs.

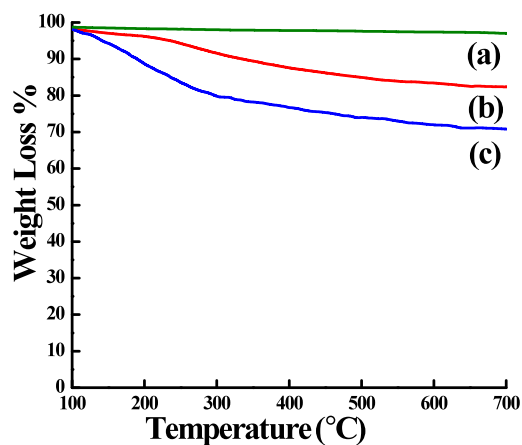

**Fig. S2** TGA spectra of (a) microcrystalline graphite (b) AFGNS and (c) NFGNS.

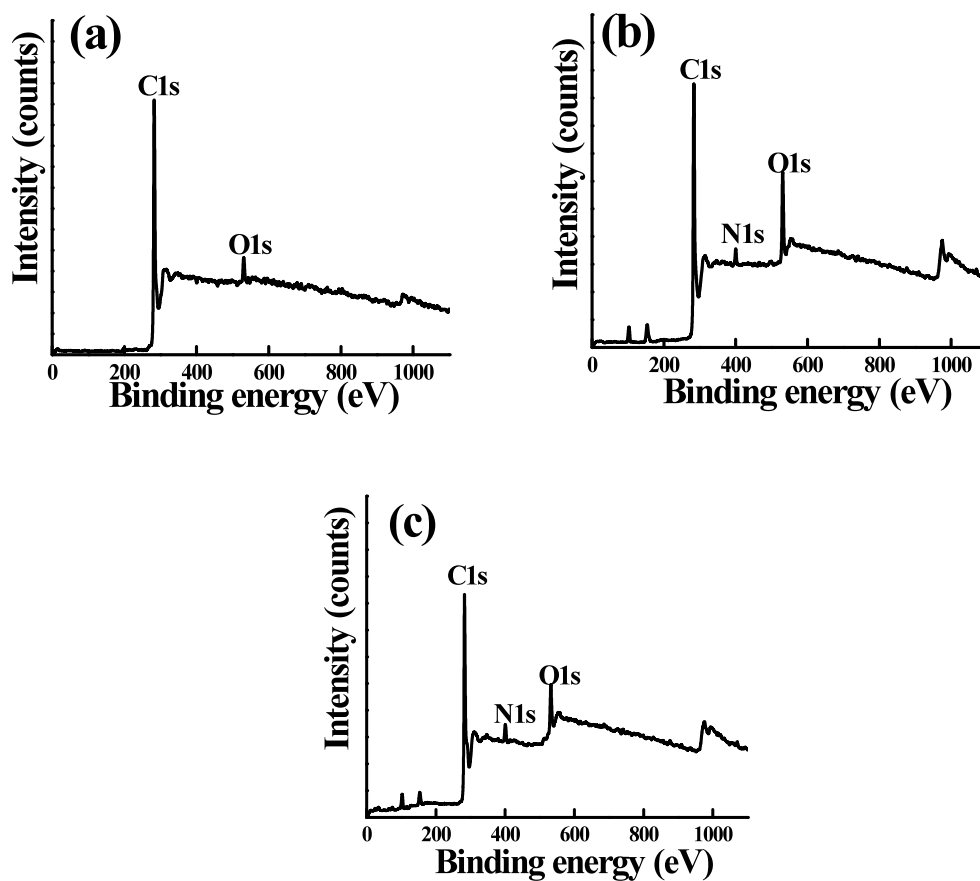

**Fig. S3** XPS survey scan of (a) microcrystalline graphite, (b) NFGNS and (c) AFGNS.

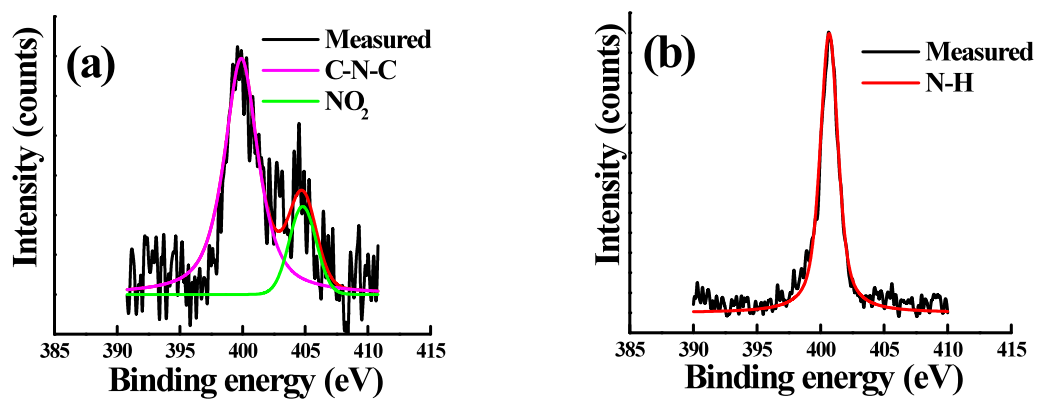

**Fig. S4** High resolution N 1s XPS of (a) NFGNS and (b) AFGNS

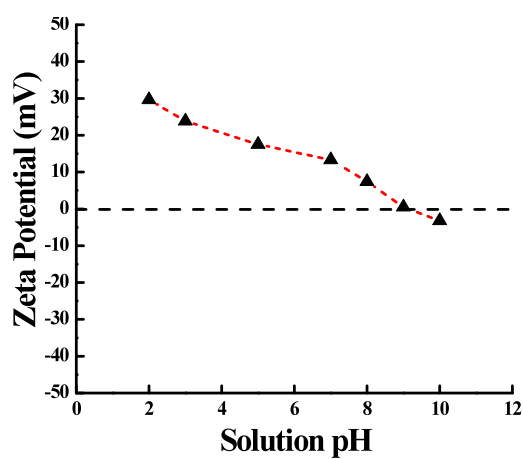

**Fig. S5** Zeta Potential of AFGNS dispersion as the function of pH.

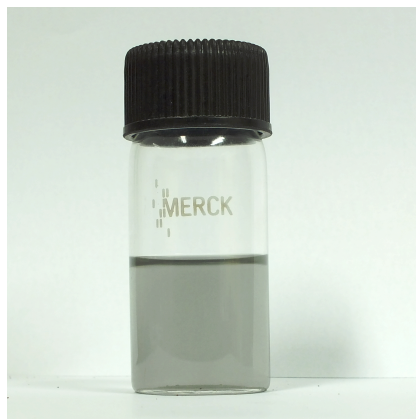

**Fig. S6** Digital photograph of the aqueous dispersion of AFGNS (2 mg AFGNS powder in 10 ml water, 30 min ultrasonication).

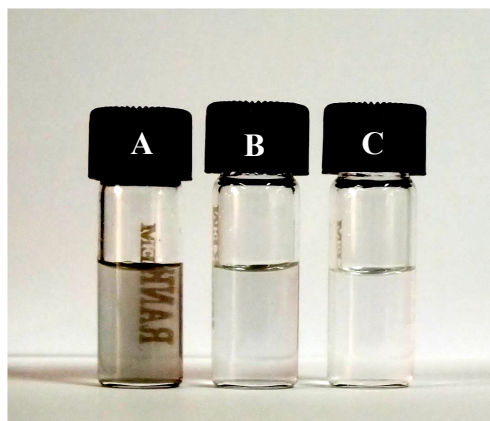

**Fig. S7** Digital photograph of the centrifugates: A) P-AFGNS, B) AFGNS and C) microcrystalline graphite. In all the cases, an aqueous dispersion of 2 mg powder in 10 ml water was centrifuged at 3000 rpm for 15 min.



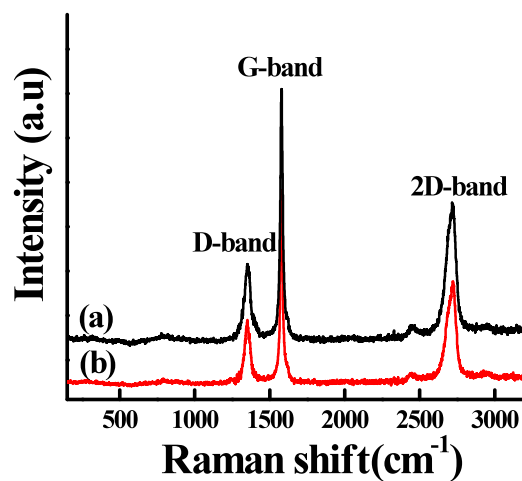

**Fig. S8** Raman spectra of (a) P-AFGNS and (b) AFGNS.

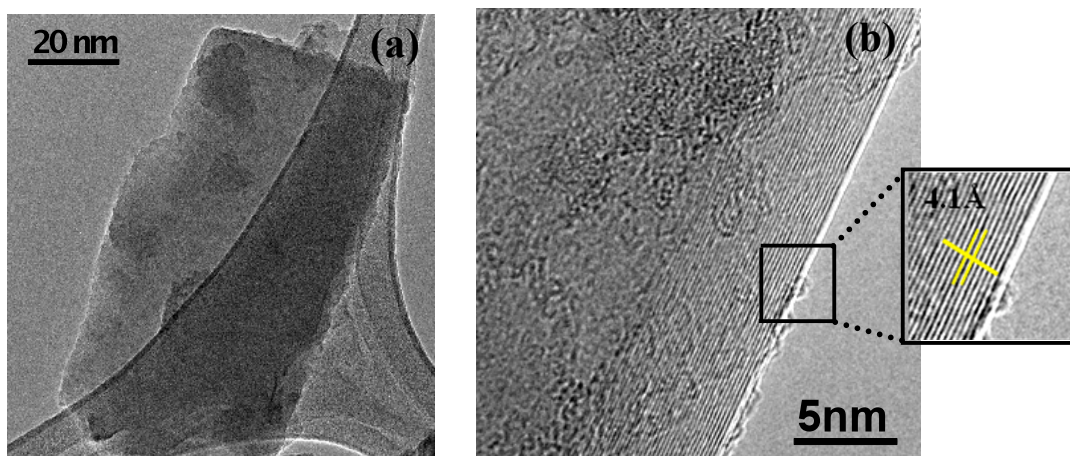

**Fig. S9** (a) TEM image and (b) HRTEM image of P-AFGNS with visible rough surface due to the attachment of the polymer PEG on AFGNS surface. Magnified image shows interlayer spacing.

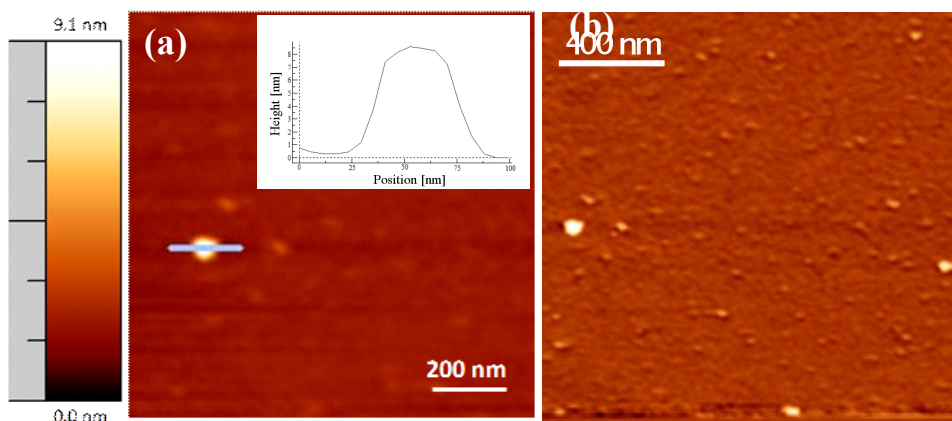

**Fig. S10** AFM (a) height image of P-AFGNS with the height profile of the marked region in inset, (b) phase image of AFGNS.

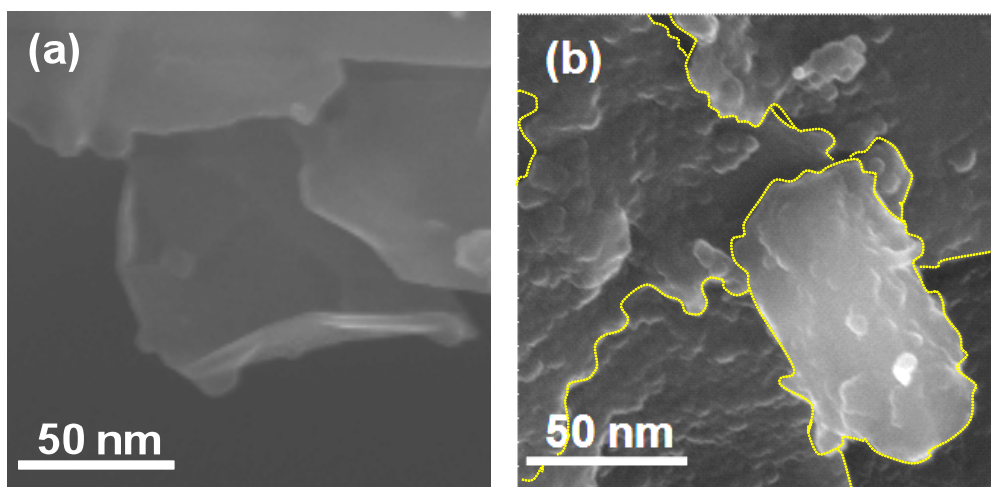

**Fig. S11** FESEM micrographs of (a) AFGNS and (b) P-AFGNS composite.

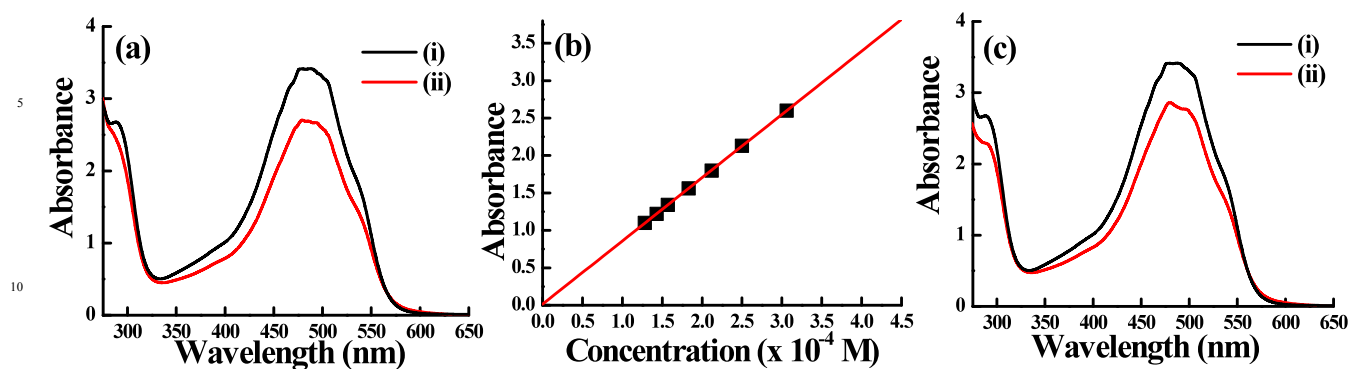

**Fig. S12** (a) UV-Vis spectra of AFGNS-DOX where (i) initial DOX dosage and (ii) unbound DOX dosage found in the centrifugate (b) calibration graph of DOX at different concentrations and (c) UV-Vis spectra of P-AFGNS-DOX where (i) initial DOX dosage and (ii) unbound DOX dosage found in the centrifugate. The loading capacity was calculated to be 34.9% in AFGNS and 29.6% in P-AFGNS.
